# Supplementary material
Source: PubMed Central journal article supplement (PMC4565992)
Supplement: supp_cwv032_cwv032supp_figs.pdf [file supp_cwv032_cwv032supp_figs.pdf]

# **Expression of Stage Specific Embryonic Antigen-4 (SSEA-4) defines spontaneous loss of epithelial phenotype in human solid tumor cells**

**Running title: SSEA-4 defines changes in epithelial phenotype of solid tumors**

**Kavitha Sivasubramaniyan<sup>1†</sup>, Abhishek Harichandan<sup>1,4†</sup>, Karin Schilbach<sup>2</sup>, Andreas Mack<sup>3</sup>, Jens Bedke<sup>4</sup>, Arnulf Stenzl<sup>4</sup>, Lothar Kanz<sup>1</sup>, Gerhard Niederfellner<sup>5</sup>, Hans-Jörg Bühring<sup>1\*</sup>**

<sup>1</sup> University Clinic of Tübingen, Department of Internal Medicine II, Division of Hematology, Immunology, Oncology, Rheumatology and Pulmonology, Tübingen, Germany

<sup>2</sup> University Children's Hospital, Department of Pediatric Stem Cell Transplantation, Tübingen 72076, Germany

<sup>3</sup> Institute of Clinical Anatomy and Cell Analysis, Eberhard Karls University of Tübingen

<sup>4</sup> University Clinic of Tübingen, Department of Urology, Tübingen, Germany

<sup>5</sup> Discovery Oncology, Pharma Research and Early Development, Roche Diagnostics GmbH, Penzberg, Germany

† authors contributed equally to this work

\*Author of correspondence: **Dr. Hans-Jörg Bühring, Ph.D.**

University Clinic of Tübingen, Department of Internal Medicine II,  
Division of Hematology, Immunology, Oncology, Rheumatology and  
Pulmonology, Otfried-Müller-Str. 10, 72076 Tübingen, Germany

Email: [hans-joerg.buehring@uni-tuebingen.de](mailto:hans-joerg.buehring@uni-tuebingen.de)

Ph: +49-7071-2982730

Fax: +49-7071-292730

## Supplementary Figure 1

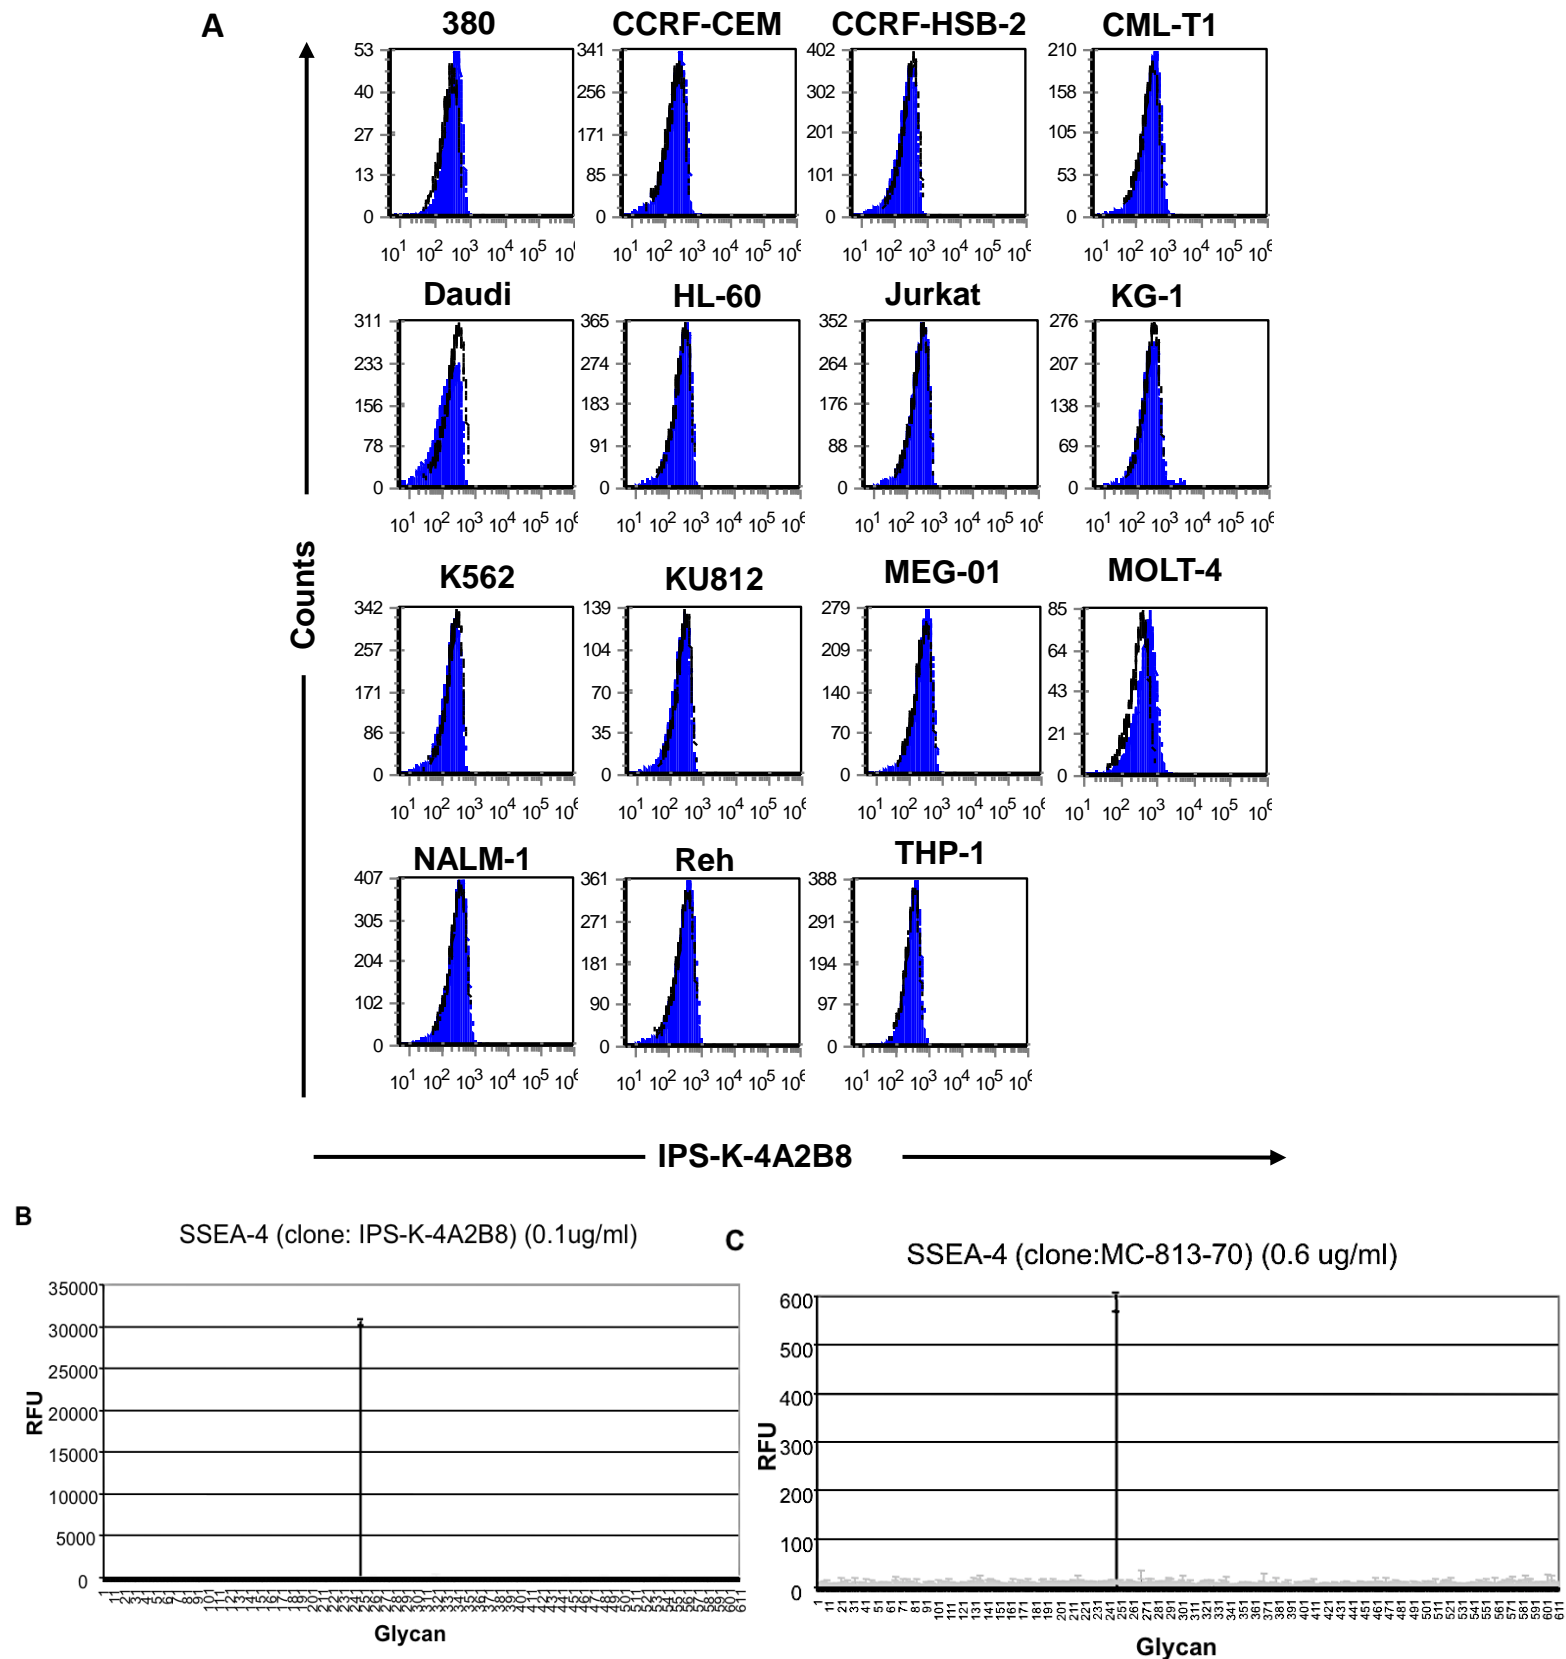

**Supplementary Figure 1. (A) Reactivity profiles of mAb IPS-K-4A2B8 on leukemic cell lines.** Cells were labeled with mAb IPS-K-4A2B8 using indirect immunofluorescence staining as described in the supplementary methods. Cells were analyzed on a FACSCanto flow cytometer. Data were processed using the FCS Express software. Note that the antibody IPS-K-4A2B8 does not react with any of the tested leukemic cell lines. **(B, C) Binding of mAb IPS-K-4A2B8 and mAb MC-813-70 to 611 different carbohydrate structures on a glycan array chip.** The value of relative fluorescence units (RFU) is related to the amount of antibody bound to each of the individual glycans. Note that mAb IPS-K-4A2B8 (B) and mAb MC813 (C) bind only to one glycan corresponding to SSEA-4 with RFU values of 30,000 and 600 respectively, indicating a 50 times stronger binding of IPS-K-4A2B8 compared to MC-813-70.

## Supplementary Figure 2

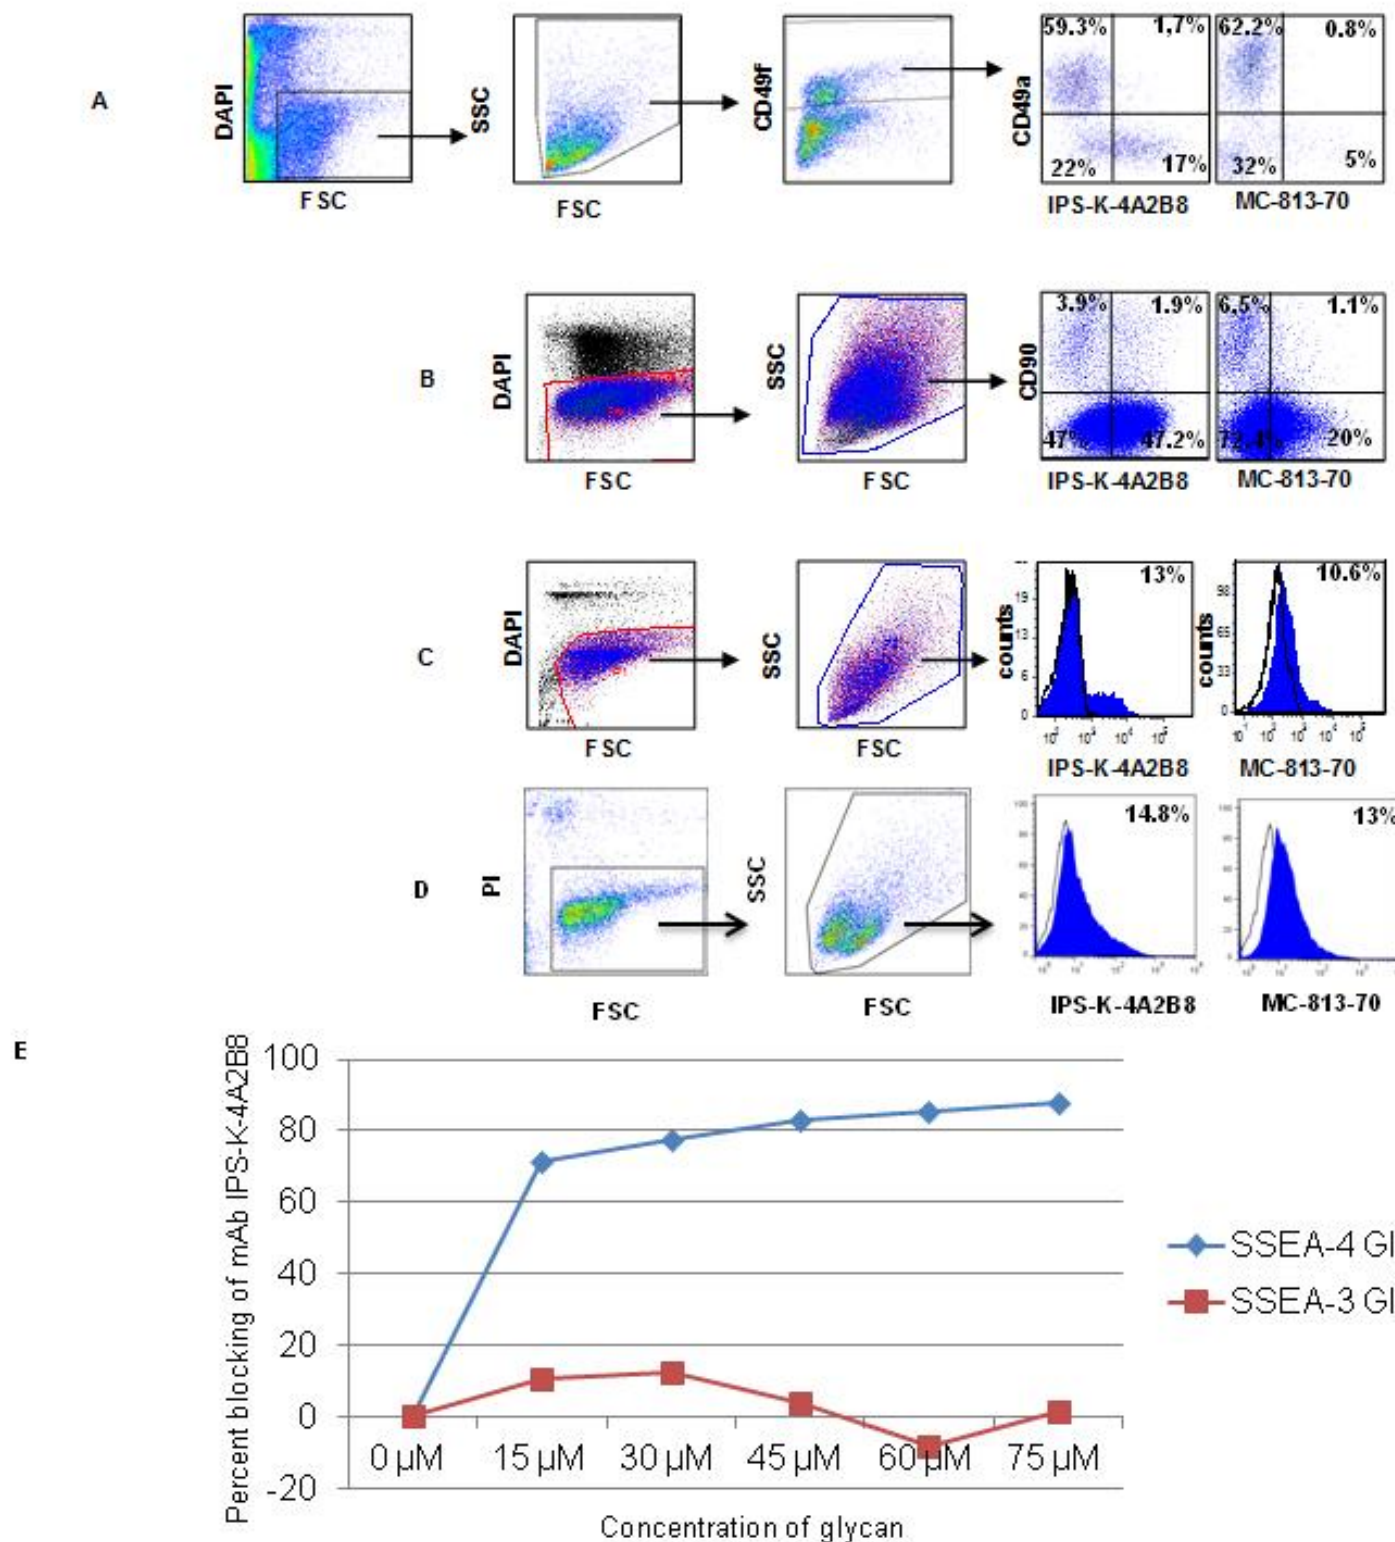

**Supplementary Figure 2. (A-D) Reactivity profiles of SSEA-4 specific antibodies IPS-K-4A2B8 and MC-813-70. (A)** Enzymatically isolated cells from human testis were stained with CD49f-FITC, CD49a-Alexa Fluor 647 and IPS-K-4A2B8-PE or MC-813-70-PE. Cells were gated on CD49f<sup>+</sup> cells and analyzed for coexpression of CD49a and SSEA-4. **(B)** Enzymatically isolated cells from amniotic membrane of human placenta were stained with CD90 and SSEA-4 specific IPS-K-4A2B8-PE or MC-813-70-PE. **(C)** Cultured cells (passage 2) derived from amniotic membrane of placenta were stained with IPS-4A2B8-PE or MC-813-70-PE. Note that the reactivity of IPS-4A2B8 is stronger than MC-813-70 in all the analyzed cell types. **(D)** Reactivity profile of IPS-K-4A2B8-PE or MC-813-70-PE on DU145 cell line **(E)** Blocking of the binding of mAb IPS-K-4A2B8 to NT-2 cells by SSEA-3 and SSEA-4 glycan.

Supplementary Figure 3

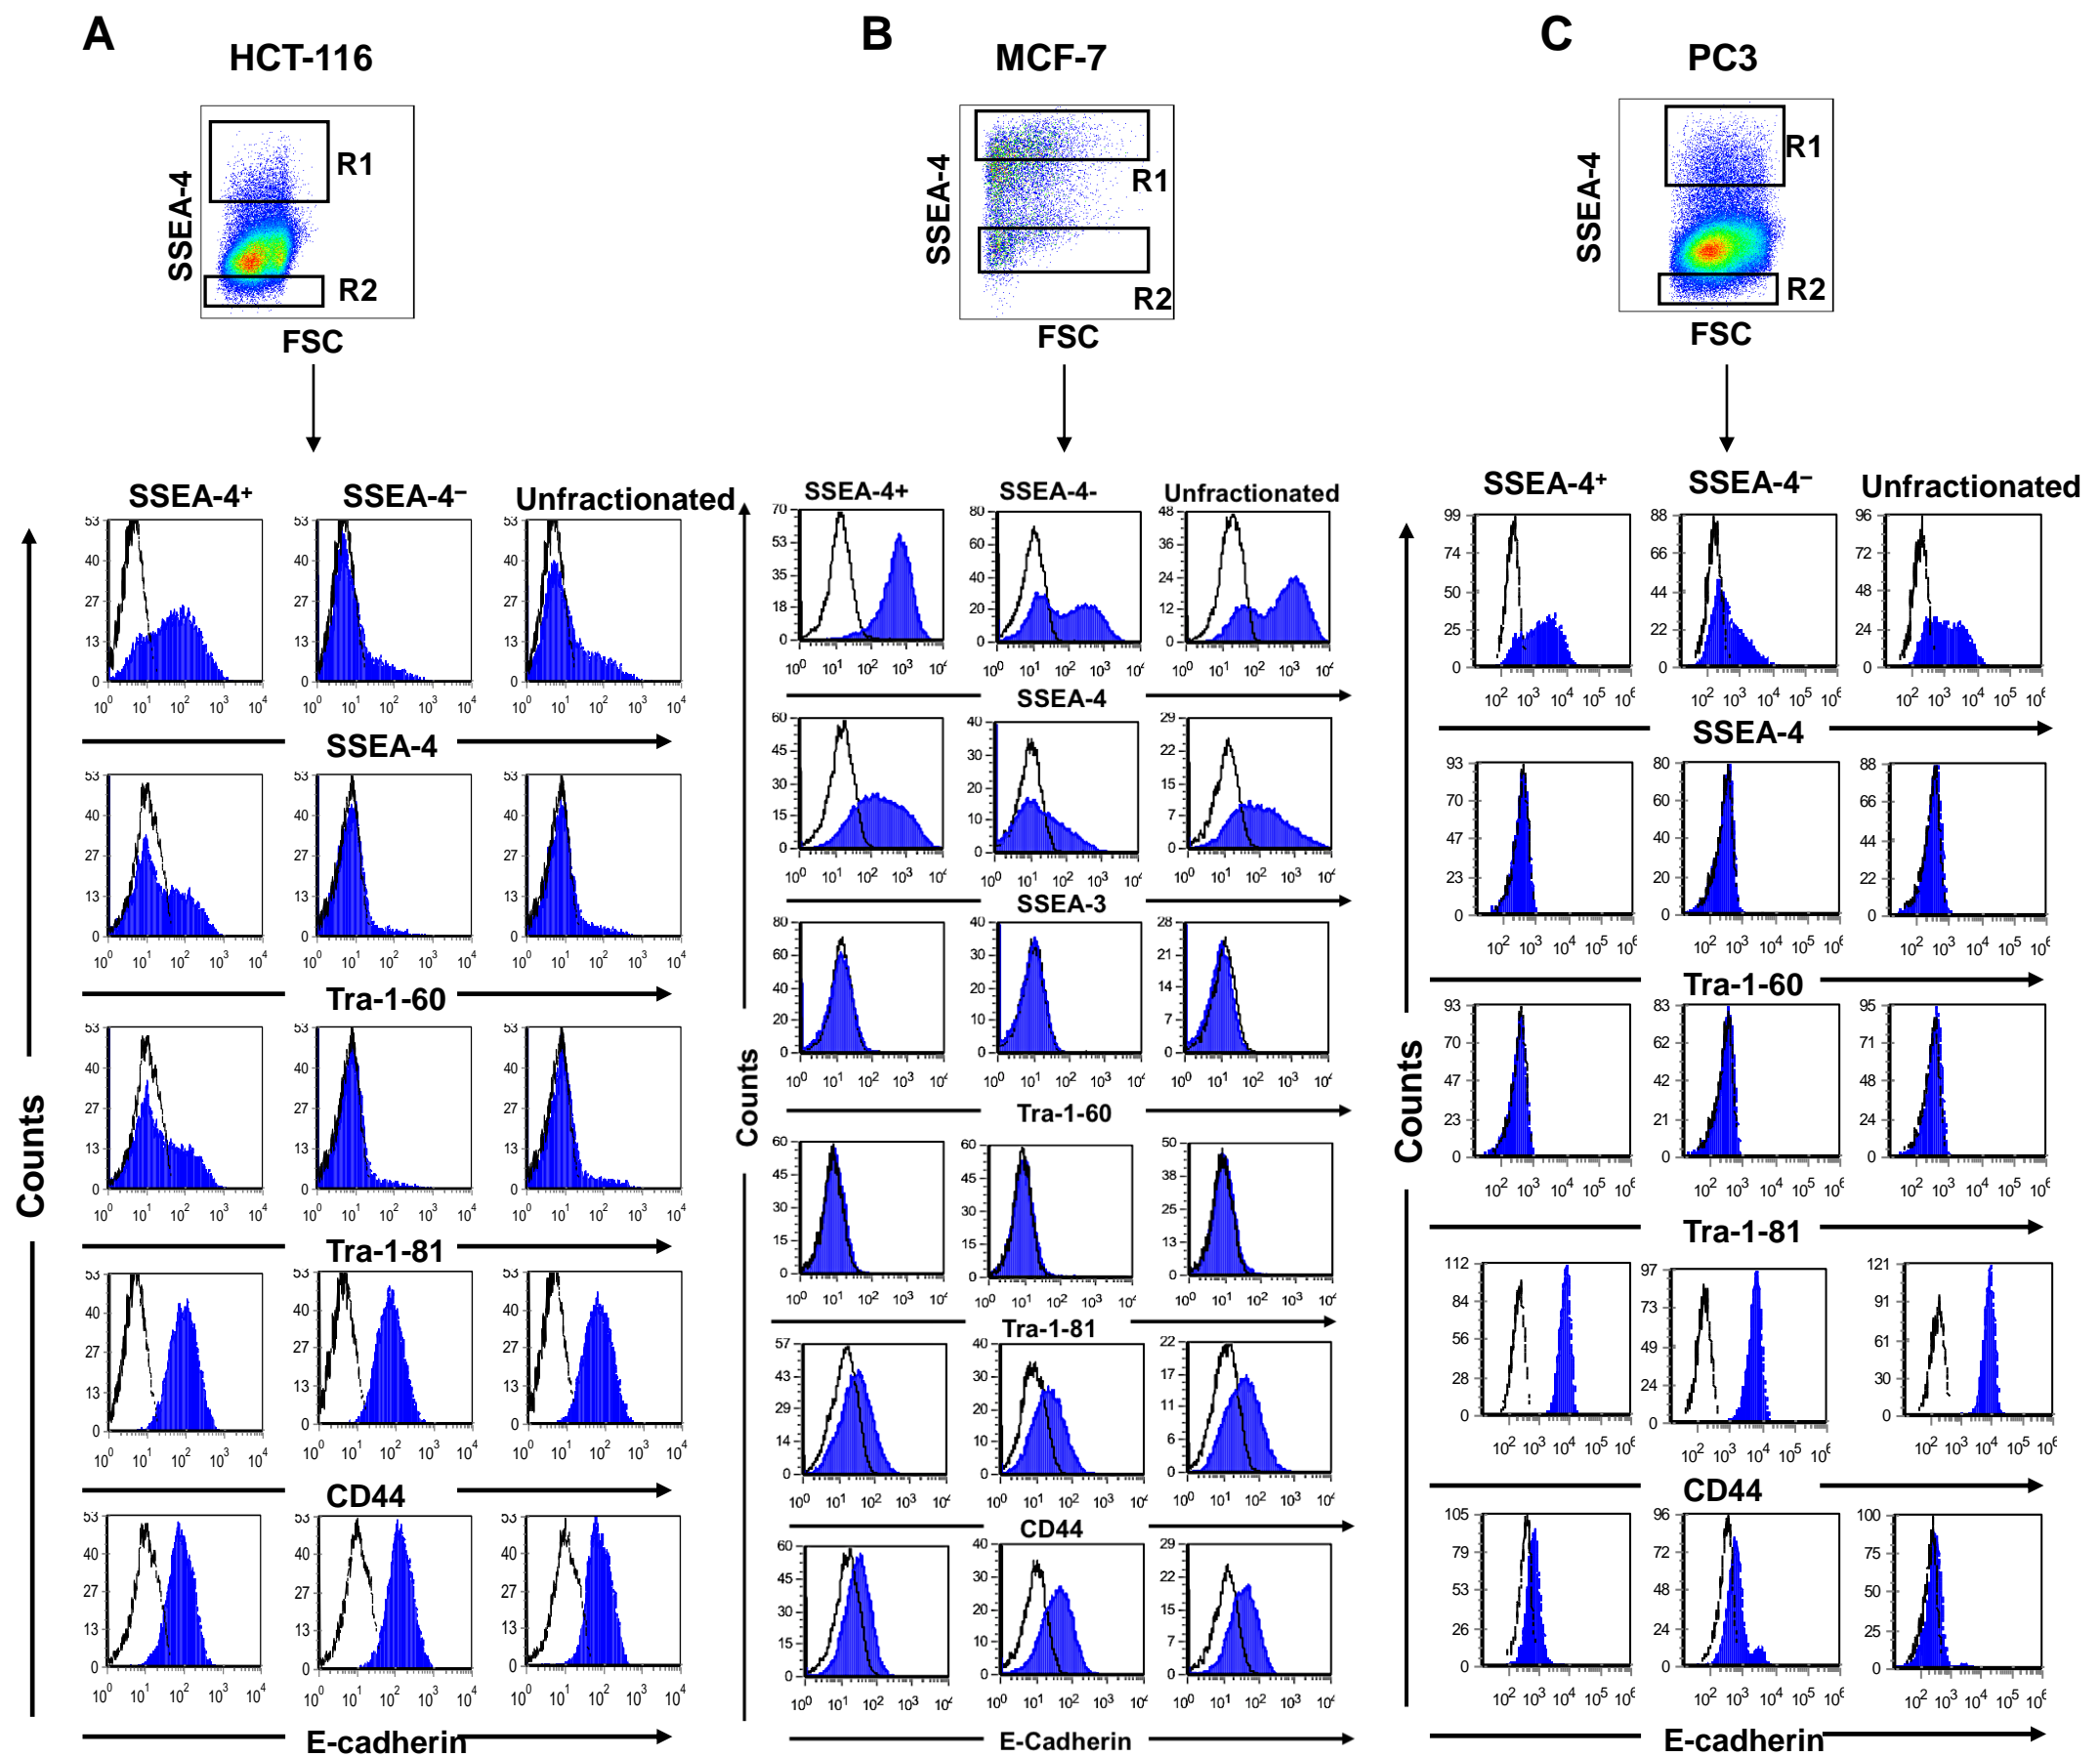

**Supplementary Figure 3. SSEA-4 defines a distinct subpopulation of HCT-116, MCF-7 and PC3 cells.** Display of SSEA-4 expression on (A) HCT-116, (B) MCF-7 and (C) PC3 cells. Sort windows R1 and R2 were set and cells were sorted on a FACS Aria cell sorter. Sorted cells were cultured for 4- 11 days, followed by phenotypic characterization by FACS analysis.



## Supplementary Figure 4

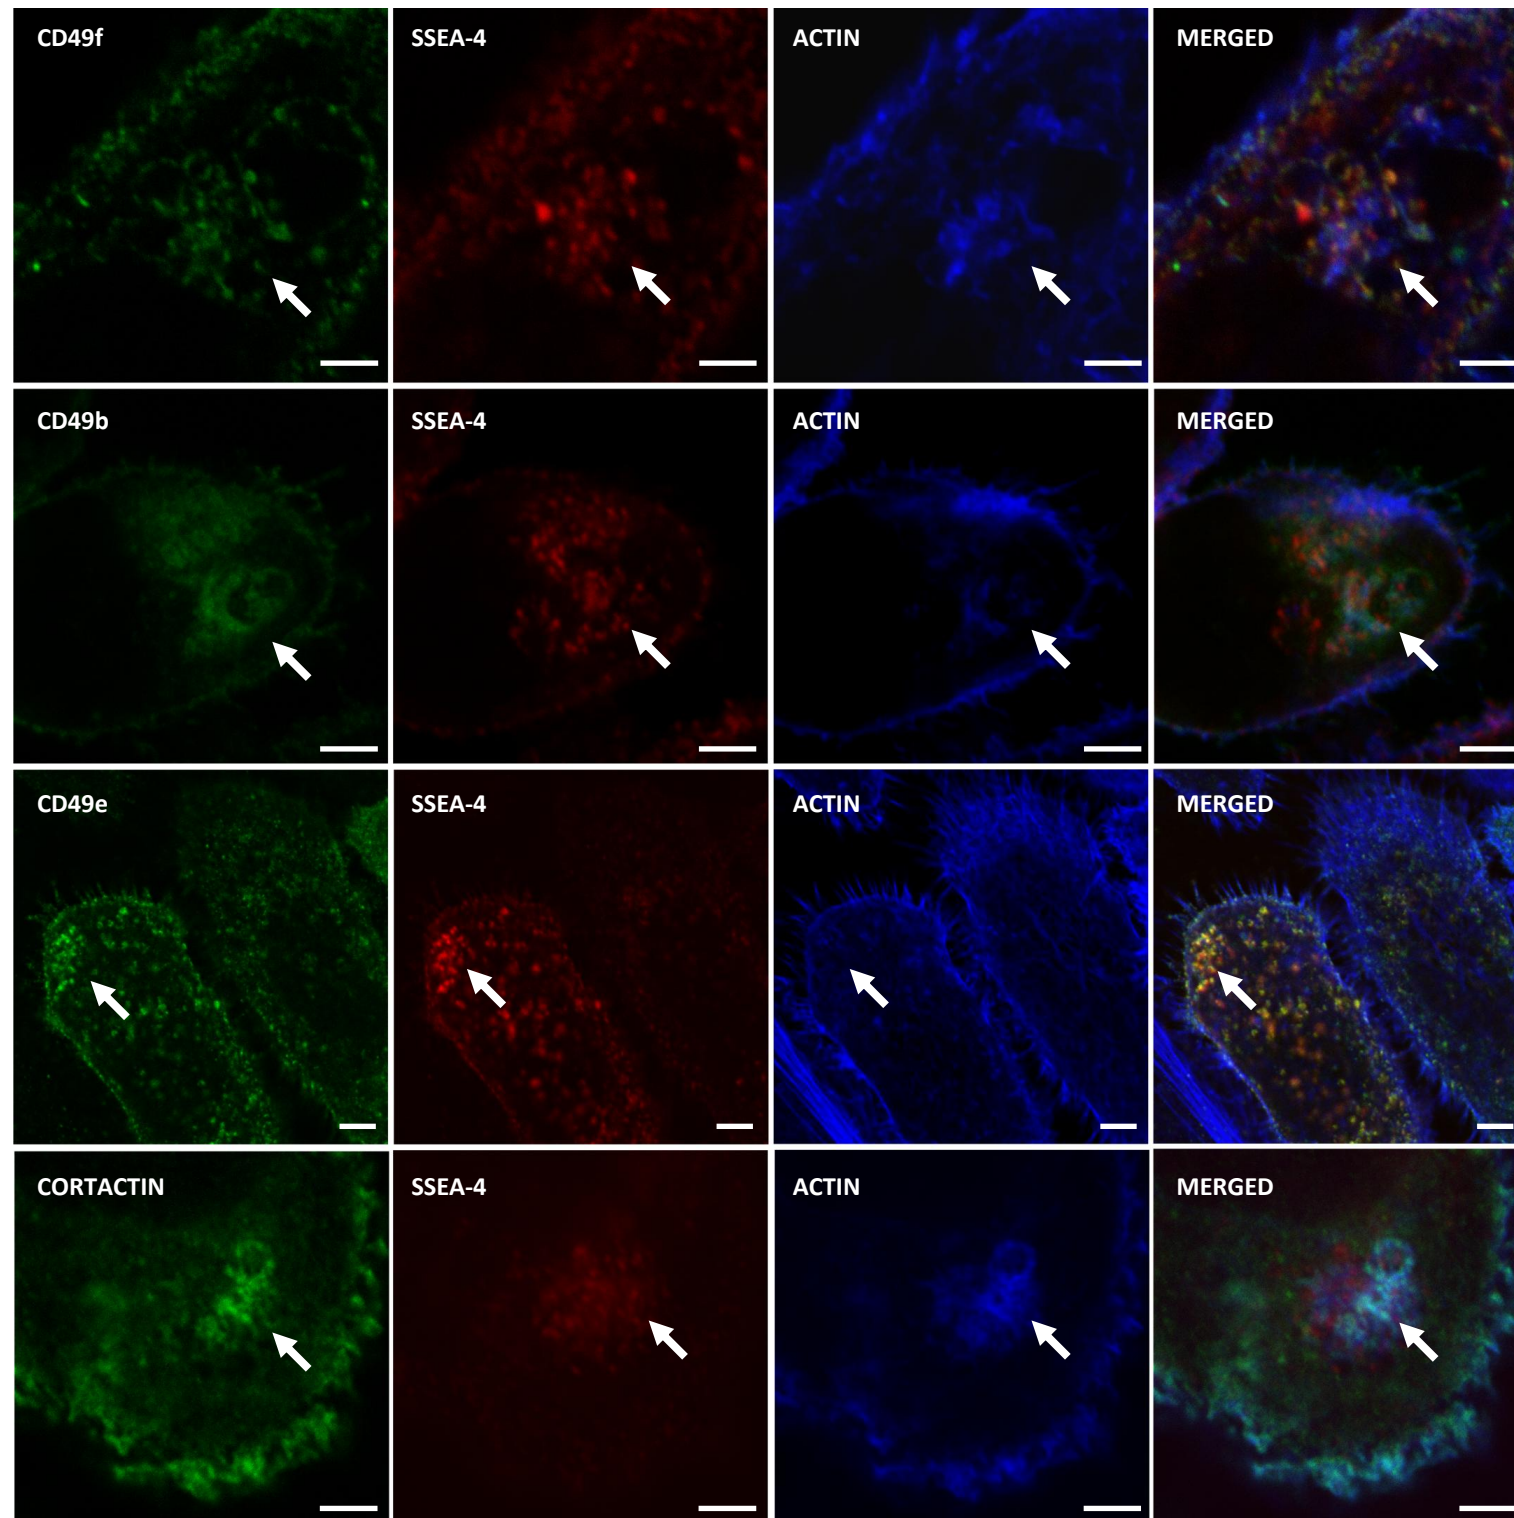

**Supplementary figure 4. Localization of SSEA-4, F-actin, cortactin and integrins on PC3 cells.** Three color staining of adherent PC3 cells with phalloidin (F-actin), IPS-K-4A2B8 mAb and anti-integrins or anti-cortactin shows that CD49f, CD49e, CD49b and cortactin colocalize with SSEA-4 and F-actin accumulating spots. Arrows point to accumulation of integrins as well as cortactin at F-actin and SSEA-4 accumulating structures. Observed under 100x magnification in Zeiss LSM 510 META confocal laser scanning microscope . Scale bars: 5  $\mu$ m

## Supplementary Figure 5

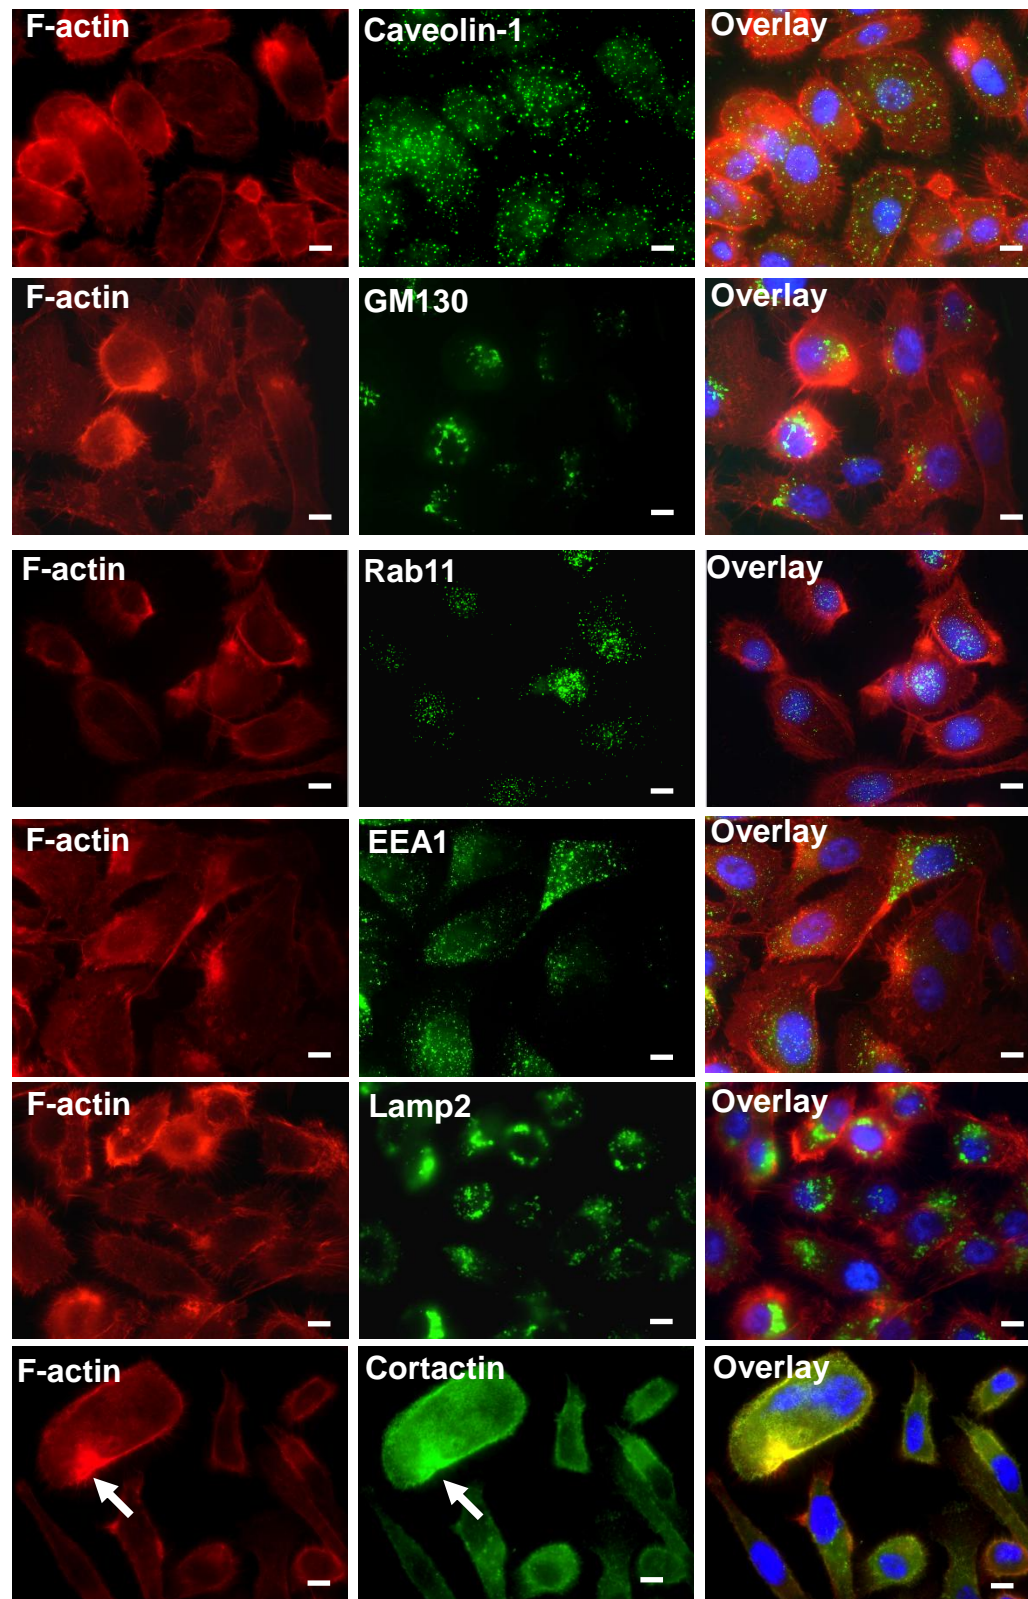

**Supplementary Figure 5. Localization of F-actin and organelle specific markers on PC3 cells.** Adherent PC3 cells were stained for organelle specific markers like caveolin-1 (caveolae), GM130 (Golgi apparatus), Rab11 (recycling endosomes), EEA1 (early endosomes), Lamp2 (lysosomes) or cortactin (invadopodia) and F-actin. F-actin accumulating puncta showed no colocalization with caveolin-1, GM130, Rab11, EEA1 and Lamp2 suggesting that F-actin accumulating structures do not correspond to caveolae, Golgi apparatus, recycling endosomes, early endosomes and lysosomes. In contrast, F-actin strongly colocalized with cortactin (marked by  $\uparrow$ ) indicating that F-actin accumulating puncta correspond to invadopodia. Scale bars: 10  $\mu$ m.



## Supplementary Figure 6

**A**

| Cell type                       | SSEA-4 <sup>+</sup><br>CD44 <sup>-</sup><br>(3000<br>Cells) | SSEA-4 <sup>-</sup><br>CD44 <sup>+</sup><br>(3000<br>Cells) | SSEA-4 <sup>-</sup><br>CD44 <sup>-</sup><br>(3000<br>Cells) | Unfractionate<br>d<br>(3000 cells) |
|---------------------------------|-------------------------------------------------------------|-------------------------------------------------------------|-------------------------------------------------------------|------------------------------------|
| No. of sites of tumor formation | 5/6                                                         | 2/6                                                         | 3/6                                                         | 4/6                                |

**B**

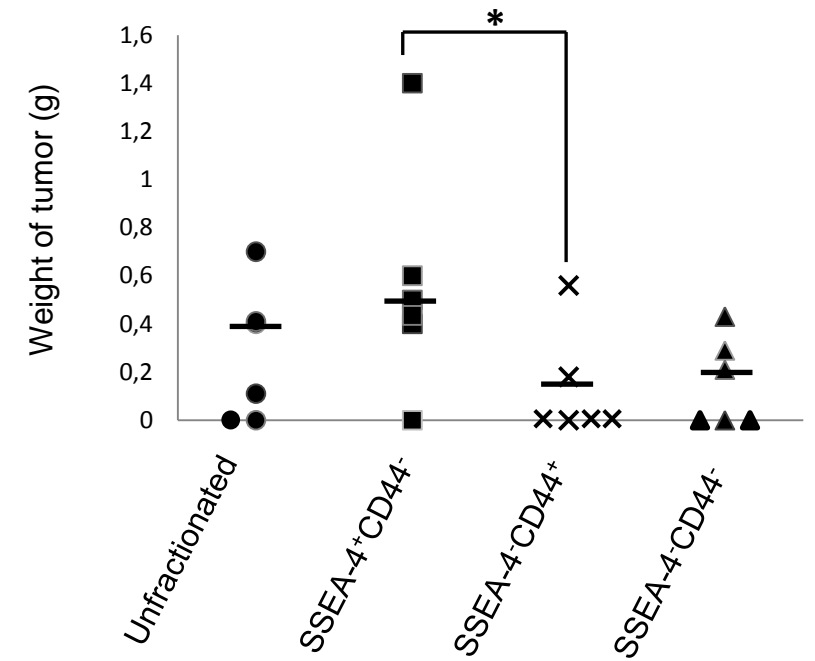

**C**

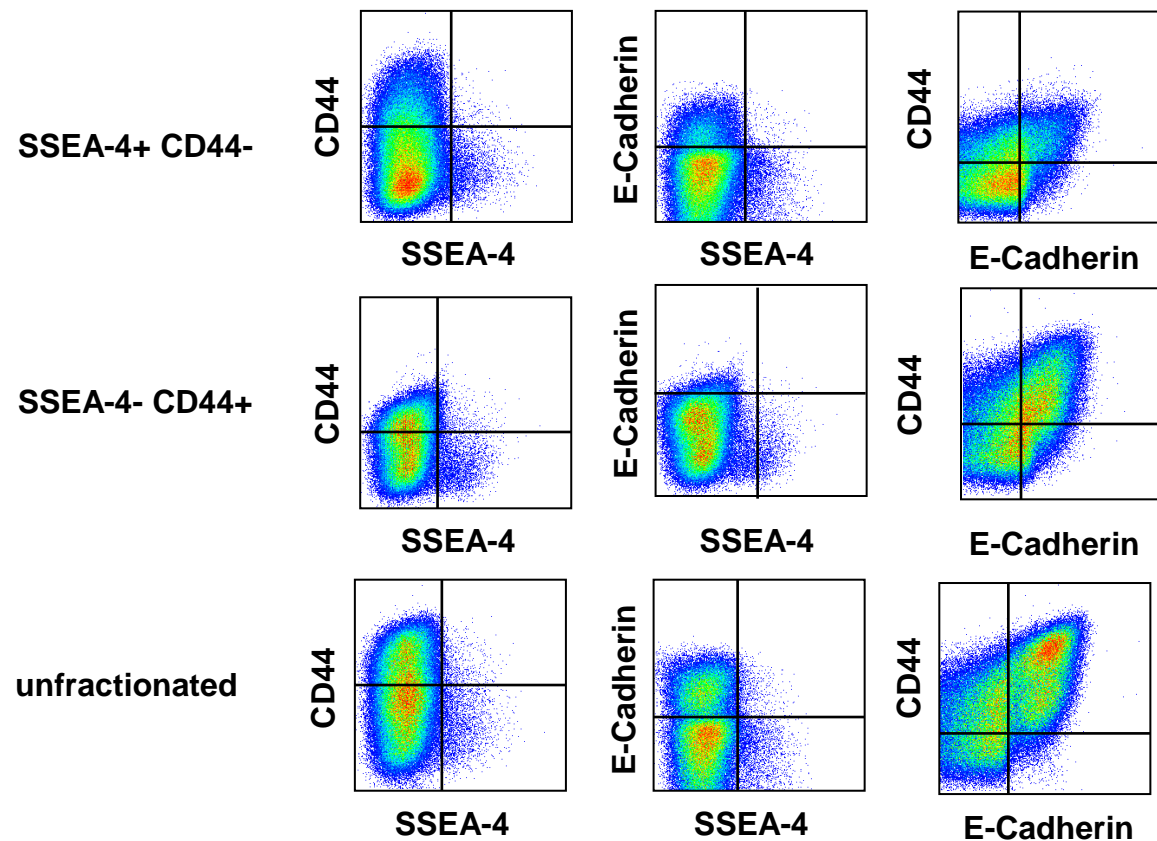

**Supplementary Figure 6. Tumorigenicity of SSEA-4<sup>±</sup> cells (A)** Serial subcutaneous transplantation of SSEA-4<sup>+</sup>CD44<sup>-</sup>, SSEA-4<sup>-</sup>CD44<sup>+</sup>, SSEA-4<sup>-</sup>CD44<sup>-</sup> and unfractionated DU145 cells isolated from xenografts derived from unfractionated DU145 cells show higher efficiency of tumor induction by SSEA-4<sup>+</sup>CD44<sup>-</sup> cells. **(B)** Graph of statistical dot plot showing the frequency and the size of tumors generated by the marker-positive or negative cells at 80 days following transplantation. **(C) SSEA4<sup>+</sup> cells spontaneously give rise to SSEA4<sup>-</sup> cells in vivo or vice versa**. Xenografts derived from SSEA-4<sup>+</sup>CD44<sup>-</sup>, SSEA-4<sup>-</sup>CD44<sup>+</sup> and unfractionated DU145 cells transplanted subcutaneously into NSG mice were harvested 80 days after transplantation. Tumors were dissected and digested into single cell suspension. The cells were stained for SSEA-4 and E-Cadherin or CD44 and analyzed by flow cytometry.
