# Supplementary material
Source: PubMed Central journal article supplement (PMC4565992)
Supplement: supp_cwv032_cwv032supp_tables.pdf [file supp_cwv032_cwv032supp_tables.pdf]

# Expression of Stage Specific Embryonic Antigen-4 (SSEA-4) defines spontaneous loss of epithelial phenotype in human solid tumor cells

**Running title: SSEA-4 defines changes in epithelial phenotype of solid tumors**

**Kavitha Sivasubramaniyan<sup>1†</sup>, Abhishek Harichandan<sup>1,4†</sup>, Karin Schilbach<sup>2</sup>, Andreas Mack<sup>3</sup>, Jens Bedke<sup>4</sup>, Arnulf Stenzl<sup>4</sup>, Lothar Kanz<sup>1</sup>, Gerhard Niederfellner<sup>5</sup>, Hans-Jörg Bühring<sup>1\*</sup>**

<sup>1</sup> University Clinic of Tübingen, Department of Internal Medicine II, Division of Hematology, Immunology, Oncology, Rheumatology and Pulmonology, Tübingen, Germany

<sup>2</sup> University Children's Hospital, Department of Pediatric Stem Cell Transplantation, Tübingen 72076, Germany

<sup>3</sup> Institute of Clinical Anatomy and Cell Analysis, Eberhard Karls University of Tübingen

<sup>4</sup> University Clinic of Tübingen, Department of Urology, Tübingen, Germany

<sup>5</sup> Discovery Oncology, Pharma Research and Early Development, Roche Diagnostics GmbH, Penzberg, Germany

† authors contributed equally to this work

\*Authors of correspondence: **Dr. Hans-Jörg Bühring, Ph.D.**  
University Clinic of Tübingen, Department of Internal Medicine II,  
Division of Hematology, Immunology, Oncology, Rheumatology and  
Pulmonology, Otfried-Müller-Str. 10, 72076 Tübingen, Germany  
Email: [hans-joerg.buehring@uni-tuebingen.de](mailto:hans-joerg.buehring@uni-tuebingen.de)  
Ph: +49-7071-2982730  
Fax: +49-7071-292730

**Suppl. Table 1. Reactivity profiles of existing in-house generated mAbs on different cell lines**

|          | A-172 | Caco-2  | MCF-7        | A431         | T47D | HT1080      | Calu-3     | K562        | U-118 | DU4478      | HC-1        | KU812 |
|----------|-------|---------|--------------|--------------|------|-------------|------------|-------------|-------|-------------|-------------|-------|
| 2E4B4A11 | ++    | -       | +<br>(sub)   | +++          | -    | ++          | -          | -           | +++   | +           | -           | ++    |
| 6D3H7    | -     | +++     | ++           | +++          | +++  | ++          | ++         | +++         | +++   | +++         | ++          | +++   |
| 7C5G1    | +     | ++      | -            | +++          | +    | +           | ++         | -           | +++   | ++          | +<br>(sub)  | ++    |
| 9A3G2    | -     | ++      | -            | +            | +    | -           | -          | -           | ++    | ++          | -           | ++    |
| 56D5A1A8 | -     | -       | -            | +<br>(sub)   | +    | -           | -          | ++          | +     | ++          | -           | ++    |
| 56D2H5   | +     | -       | -            | +++          | +++  | -           | -          | ++          | +     | ++          | ++<br>(sub) | +++   |
| 58B1A2   | +++   | +++     | +++          | +++          | +++  | +++         | +++        | +++         | +++   | ++          | -           | ++    |
| 59A3B3   | -     | ++      | ++           | +++          | +++  | +           | ++         | ++          | +++   | +++         | ++          | +++   |
| BV2A5B6  | +++   | -       | -            | +            | ++   | +++         | -          | -           | +++   | ++          | -           | ++    |
| BV8C2C2  | -     | -       | -            | +            | ++   | +           | -          | ++          | +     | ++          | +           | ++    |
| HEK-3D6  | +++   | ++      | +++          | +++          | +++  | +           | +<br>(sub) | ++          | ++    | +++         | -           | ++    |
| HEK-6D6  | -     | -       | -            | ++           | +++  | -           | -          | -           | -     | +++         | -           | +     |
| HEK-8C6  | +++   | +++     | +++          | +++          | +++  | +++         | +          | +++         | +++   | +++         | +++         | +++   |
| HEK4-1A1 | +     | +       | ++           | ++           | ++   | +           | +          | ++          | ++    | ++          | +           | +++   |
| HEK4-2D6 | -     | -       | -            | -            | ++   | +           | -          | -           | -     | ++          | -           | +++   |
| HEK5-1B3 | +++   | +++     | +++          | +++          | +++  | +++         | +++        | +++         | +++   | ++          | -           | +++   |
| HEK5-2B5 | -     | -       | -            | -            | +++  | +           | -          | ++<br>(sub) | +     | ++          | -           | ++    |
| HEK7-4D1 | -     | +++     | ++           | +++          | +++  | ++          | ++         | +++         | +++   | +++         | ++          | +++   |
| HEK9-2B5 | -     | ++      | ++           | +++          | +++  | ++<br>(sub) | +          | +++         | +++   | +++         | ++          | +++   |
| HEPB3    | ++    | +       | -            | ++           | ++   | -           | -          | +           | +     | +           | -           | ++    |
| HEPC20   | -     | -       | -            | +            | +    | -           | -          | -           | -     | +           | -           | ++    |
| W1D6C4   | -     | +       | +            | +            | +    | -           | -          | -           | -     | +           | -           | ++    |
| W3D5A9   | +     | ++      | ++           | +            | ++   | -           | +          | +<br>(sub)  | -     | -           | -           | ++    |
| W5C4C5   | +++   | ++      | +++          | +++          | ++   | ++          | ++         | ++          | +++   | -           | -           | ++    |
| W5D3B11  | ++    | + (sub) | +++          | -            | ++   | -           | -          | -           | -     | -           | -           | +     |
| W5C5A8   | +     | +       | ++           | ++           | ++   | -           | +          | +<br>(sub)  | -     | -           | -           | +     |
| HEK9-3C2 | ++    | ++      | +++          | +++<br>(sub) | ++   | -           | +          | +<br>(sub)  | ++    | -           | -           | +     |
| CH1A4D1  | -     | -       | +++          | -            | +    | -           | -          | -           | -     | +           | -           | ++    |
| CH2A3B5  | -     | -       | +            | -            | +    | -           | -          | -           | -     | -           | -           | -     |
| CH4D3    | -     | -       | +++<br>(sub) | -            | ++   | +           | -          | -           | +     | ++<br>(sub) | -           | -     |

(sub) reacts only with a subpopulation of cells; + weak reactivity; ++ medium reactivity; +++ strong reactivity.

**Suppl. Table 2. Reactivity profiles of newly generated iPS122 derived mAbs on different cell lines**

(sub) reacts only with a subpopulation of cells; + weak reactivity; ++ medium reactivity; +++ strong reactivity.

|             | SW480   | SW620   | HCT-116 | Caco-2  | MCF-7   | Tcam-2  | NT2     | NCCIT   | 2102 Ep | PC3     | DU145   | Weri-Rb1 | HeLa |
|-------------|---------|---------|---------|---------|---------|---------|---------|---------|---------|---------|---------|----------|------|
| IPS-K-1A6G5 | -       | +       | +(sub)  | -       | -       | ++(sub) | ++(sub) | ++(sub) | ++(sub) | +       | ++(sub) | -        | -    |
| IPS-K-2B6A8 | +++     | +++     | +++     | +++     | +++     | +++     | +++     | +++     | +++     | +++     | +++     | +++      | +++  |
| IPS-K-1D4C6 | -       | +       | ++      | -       | +       | +++     | +       | -       | -       | +++     | +       | -        | +++  |
| IPS-K-3C1D1 | +++     | +++     | +++     | +       | +++     | +++     | +++     | -       | ++      | +++     | +++     | +        | +++  |
| IPS-K-3C2D5 | +++     | +++     | +++     | +++     | +++     | +++     | +++     | ++      | +++     | +++     | +++     | -        | +++  |
| IPS-K-3C4A6 | -       | +       | -       | -       | +       | ++(sub) | +(sub)  | +(sub)  | +(sub)  | (+)     | -       | -        | -    |
| IPS-K-3C5G8 | +++     | +++     | +++     | ++      | +++     | +++     | +++     | +       | ++      | +++     | +++     | ++       | +++  |
| IPS-K-4A2A9 | -       | +       | -       | -       | +       | -       | -       | +       | +       | +       | -       | -        | -    |
| IPS-K-4A2B8 | ++(sub) | ++(sub) | +(sub)  | ++(sub) | ++(sub) | ++(sub) | +++     | ++      | +++     | ++(sub) | +(sub)  | -        | -    |
| IPS-K-4B5G6 | +++     | ++      | +++     | (+)     | +++     | ++      | +++     | -       | ++      | +++     | +++     | +        | +++  |

**Suppl. Table 3. Cross blocking of GMb1 on the binding of SSEA-4 specific antibodies**

| Blocking glycosphingolipid GMb1 ( $\mu$ M) | % inhibition of test mAb binding |             |
|--------------------------------------------|----------------------------------|-------------|
|                                            | MC813-70                         | IPS-K-4A2B8 |
| 0                                          | 0                                | 0           |
| 15                                         | 9.8                              | 0           |
| 30                                         | 20.3                             | 0           |
| 45                                         | 24.6                             | 0           |
| 60                                         | 19.4                             | 0           |
| 75                                         | 20.2                             | 0           |

**Suppl. Table 4. Generation of tumors by SSEA-4<sup>+/-</sup> cells in vivo**

| Cell type                       | SSEA-4 <sup>+</sup> |        |       | SSEA-4 <sup>-</sup> |        |       | Unfractionated |        |       |
|---------------------------------|---------------------|--------|-------|---------------------|--------|-------|----------------|--------|-------|
|                                 | 150,000             | 50,000 | 3,000 | 150,000             | 50,000 | 3,000 | 150,000        | 50,000 | 3,000 |
| No. of sites of tumor formation | 4/4                 | 4/4    | 6/6   | 4/4                 | 4/4    | 2/6   | 4/4            | 4/4    | 4/6   |

**Suppl. Table 5. Commercial antibodies used in the study**

| Antibody                                        | Source          | Catalogue Number |
|-------------------------------------------------|-----------------|------------------|
| Mouse anti-human CD24-PE                        | Miltenyi Biotec | 130-098-861      |
| Mouse anti-human CD29-PE                        | BioLegend       | 303003           |
| Mouse anti-human CD44-FITC                      | BD Biosciences  | 555478           |
| Mouse anti-human CD49a-PE                       | BD Biosciences  | 559596           |
| Mouse anti-human CD49b-PE                       | BD Biosciences  | 555669           |
| Mouse anti-human CD49e-PE                       | BD Biosciences  | 555617           |
| Mouse anti-human CD49f-FITC                     | BD Biosciences  | 555735           |
| Mouse anti-human CD51-FITC                      | BD Biosciences  | 555505           |
| Mouse anti-human CD90-APC                       | BD Biosciences  | 561971           |
| Mouse anti-human CD117-APC                      | BD Biosciences  | 561118           |
| Mouse anti-human CD133-PE                       | Miltenyi Biotec | 130-098-046      |
| Mouse anti-human CD324-PE                       | eBioscience     | 46-3249          |
| Mouse anti-human CD324-APC                      | Miltenyi Biotec | 130-099-723      |
| Mouse anti-human CD326-PE                       | eBioscience     | 12-9326          |
| Mouse anti-human CD340-PE                       | BD Biosciences  | 340552           |
| Mouse anti-human Tra-1-60-PE                    | BD Biosciences  | 560884           |
| Mouse anti-human Tra-1-81-PE                    | BD Biosciences  | 560885           |
| Mouse anti-human TNAP-PE                        | Miltenyi Biotec | 130-093-587      |
| Mouse anti-human Trop-2-APC                     | R&D systems     | FAB650A          |
| Mouse anti-human SSEA-3-PE                      | BD Biosciences  | 560879           |
| Mouse anti-human SSEA-3-FITC                    | BD Biosciences  | 560881           |
| Purified mouse anti-human Caveolin-1            | BD Biosciences  | 611338           |
| Purified mouse anti-human cortactin (p80/85)    | Millipore       | 05-180           |
| Purified mouse anti-human EEA1                  | Abcam           | ab70521          |
| Purified mouse anti-human GM130-Alexa Fluor 488 | BD Biosciences  | 560257           |
| Purified mouse anti-human CD29                  | BioLegend       | 303001           |
| Purified mouse anti-human CD49b                 | BioLegend       | 359301           |
| Purified mouse anti-human CD49e                 | BioLegend       | 328002           |
| Purified mouse anti-human CD49f                 | BioLegend       | 313602           |
| Purified mouse anti-human CD51/61               | BioLegend       | 304402           |
| Purified mouse anti-human CD104                 | BioLegend       | 327802           |

|                                              |                          |         |
|----------------------------------------------|--------------------------|---------|
| Purified mouse anti-human CD107b (LAMP2)     | BioLegend                | 354301  |
| Purified rabbit anti-human Rab11             | Abcam                    | ab3612  |
| Polyclonal Goat anti-mouse immunoglobulin-PE | DAKO                     | R048001 |
| Polyglobulin (Gamunex 10%)                   | Talecris Biotherapeutics | G130022 |
| Purified mouse anti-human CD49a              | BioLegend                | 328302  |
| Purified rat anti-human CD49f                | BD Biosciences           | 555734  |
| Alexa Fluor 488 goat anti-mouse IgG2a        | Life Technologies        | A-21131 |
| Alexa Fluor 488 goat anti-mouse IgG1         | Life Technologies        | A-21121 |
| Alexa Fluor 488 goat anti-mouse IgG2b        | Life Technologies        | A-21141 |
| Alexa Fluor 488 goat anti-mouse IgM          | Life Technologies        | A-21042 |
| Alexa Fluor 488 goat anti-mouse IgG          | Life Technologies        | A-11029 |
| Alexa Fluor 488 goat anti-rabbit IgG         | Life Technologies        | A-11034 |
| Alexa Fluor 555 goat anti-mouse IgM          | Life Technologies        | A-21426 |
| Cy3 Goat anti-mouse IgG                      | Life Technologies        | A10521  |
| Cy3 Goat Anti-rabbit IgG                     | Life Technologies        | A10520  |

**Suppl. Table 6. List of primers for qRT-PCR**

| <b>Gene symbol</b>  | <b>Gene name</b>                                    | <b>Primer sequence</b> |                           |
|---------------------|-----------------------------------------------------|------------------------|---------------------------|
| <b>CLDN7 (IS)</b>   | Claudin-7                                           | <b>F</b>               | GAGCCCTAATGGTGGTCTCC      |
|                     |                                                     | <b>R</b>               | CACTTCATGCCCATCGTG        |
| <b>CDH1 (IS)</b>    | Cadherin 1, epithelial                              | <b>F</b>               | CCGCGTCCTGGGCAGAGTGAA     |
|                     |                                                     | <b>R</b>               | CGGGTGTGCGAGGGAAAAATAGGCT |
| <b>ESRP1 (IS)</b>   | Epithelial splicing regulatory protein 1            | <b>F</b>               | TTTTGAATCCACGAGCACTG      |
|                     |                                                     | <b>R</b>               | CACCATACATCTTTCAAACACTGG  |
| <b>GAPDH</b>        | Glyceraldehyde-3-phosphate dehydrogenase            | <b>F</b>               | AGCCACATCGCTCAGACAC       |
|                     |                                                     | <b>R</b>               | GCCCAATACGACCAAATCC       |
| <b>GRHL2 (IS)</b>   | Grainyhead-like 2                                   | <b>F</b>               | GGACAGCACATACAGCGAGA      |
|                     |                                                     | <b>R</b>               | AGCCCCAACTGAAGCACTC       |
| <b>CDH2 (IS)</b>    | Cadherin 2, type 1, N-Cadherin                      | <b>F</b>               | CTCCATGTGCCGGATAGC        |
|                     |                                                     | <b>R</b>               | CGATTTCCACCAGAAGCCTCTAC   |
| <b>ST3GAL2 (IS)</b> | ST3 beta-galactoside alpha-2, 3-sialyltransferase 2 | <b>F</b>               | GTCCAGAGGTGGTGGATGAT      |
|                     |                                                     | <b>R</b>               | CAGCACCTCATTGGTGTGT       |

IS : Intron spanning
